# Supplementary material for: Uncovering the Role of Surface-Attached Ag Nanoparticles in Photodegradation Improvement of Rhodamine B by ZnO-Ag Nanorods
Source: MDPI journal article supplement (doi:10.3390/nano12162882), 2022-08-22
Supplement: s1 [file s1]

## Uncovering the Role of Surface-Attached Ag Nanoparticles in Photodegradation Improvement of Rhodamine B by ZnO-Ag Nanorods

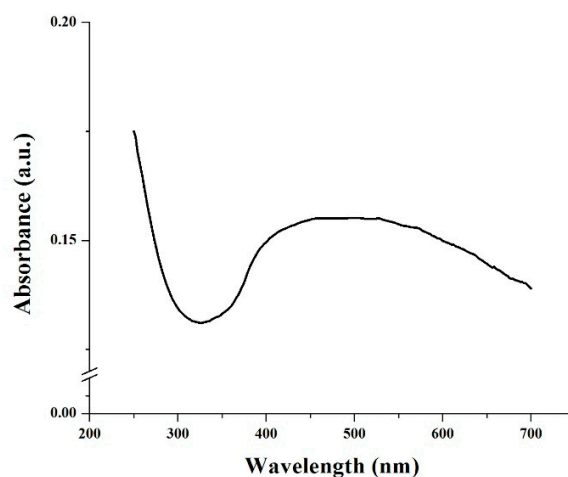

Figure S1. UV-Vis absorbance of ZnO@Ag NRs.

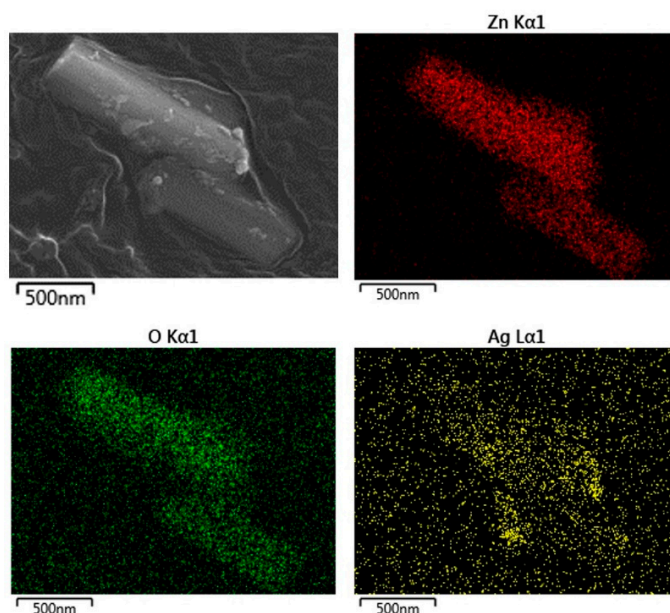

Figure S2. EDX elemental mapping of ZnO@Ag NRs.

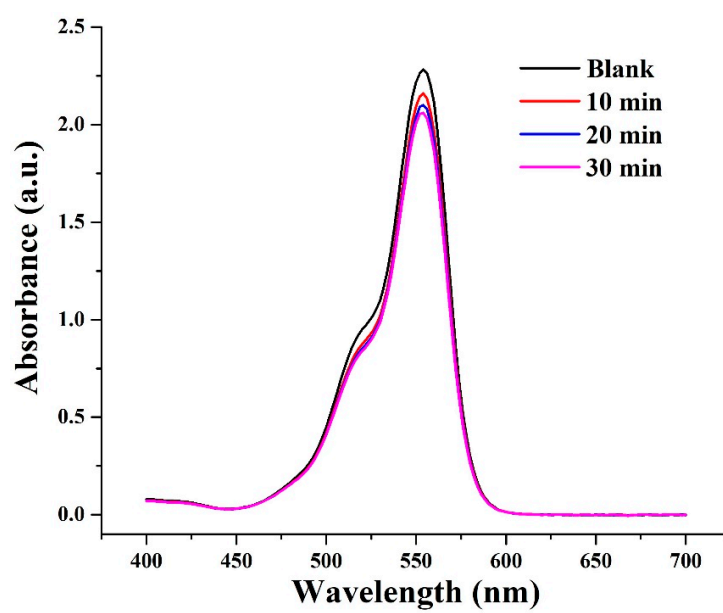

Figure S3. UV-Vis of light-irradiated RB dye (self-degradation).

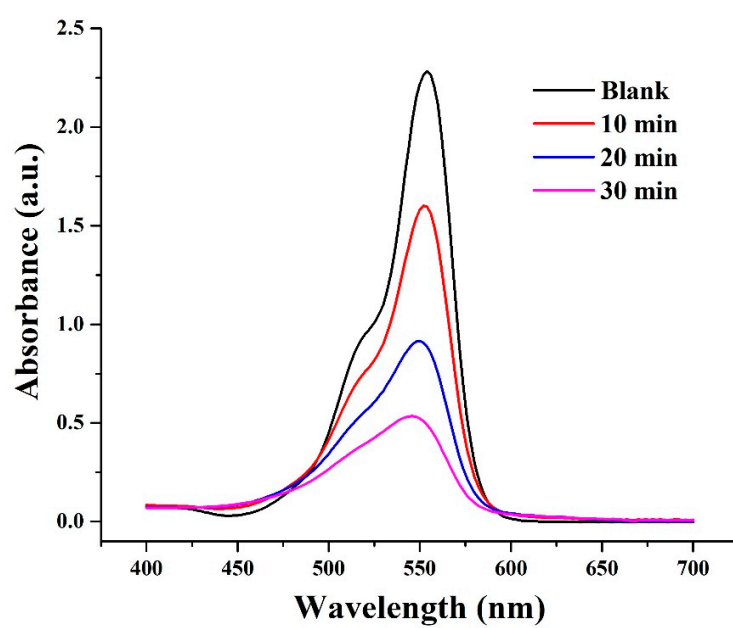

Figure S4. UV-Vis of light-irradiated RB dye (with ZnO).

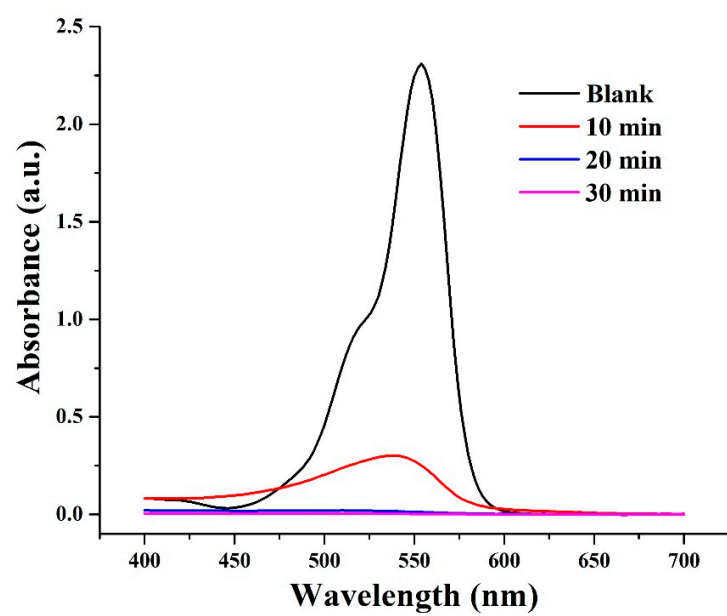

**Figure S5.** UV-Vis of light-irradiated RB dye (with ZnO-Ag).
